# Supplementary material for: FACT Prevents the Accumulation of Free Histones Evicted from Transcribed Chromatin and a Subsequent Cell Cycle Delay in G1
Source: PubMed Central journal article supplement (PMC2873916; doi:10.1371/journal.pgen.1000964), 2010-05-20
Supplement: pgen.1000964.s004.pdf [file pgen.1000964.s004.pdf]

A

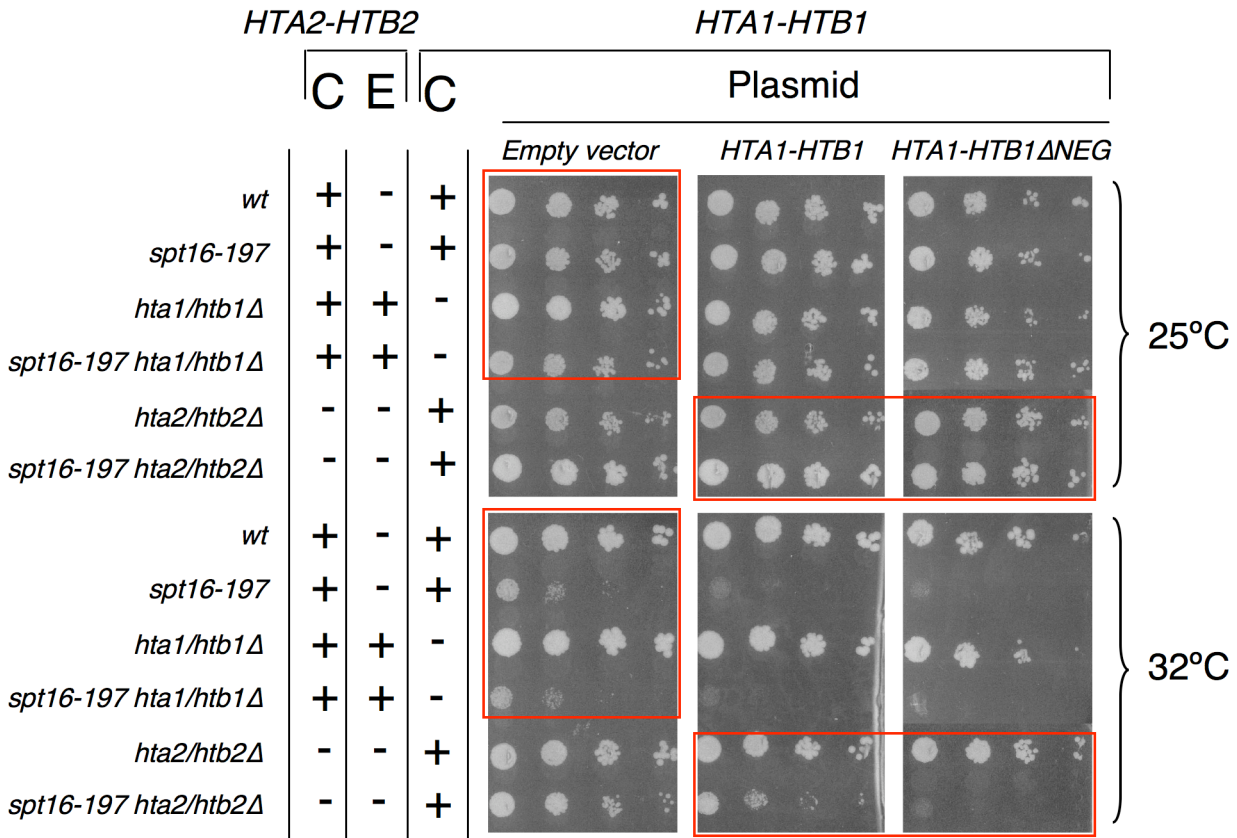

C → Chromosomal copy

E → Extrachromosomal copy of *HTA2-HTB2* (only in *hta1-htb1Δ* mutants)

B

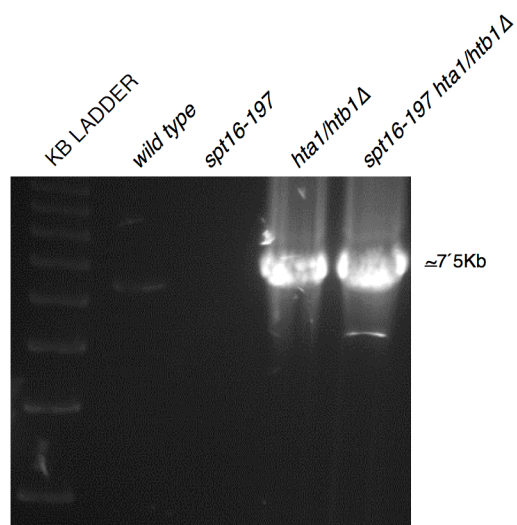

Figure S4
