# Supplementary material for: FACT Prevents the Accumulation of Free Histones Evicted from Transcribed Chromatin and a Subsequent Cell Cycle Delay in G1
Source: PubMed Central journal article supplement (PMC2873916; doi:10.1371/journal.pgen.1000964), 2010-05-20
Supplement: pgen.1000964.s005.pdf [file pgen.1000964.s005.pdf]

**A**

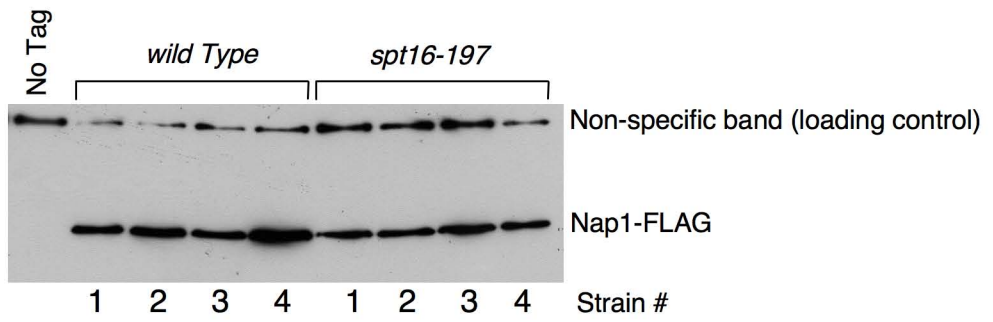

**B**

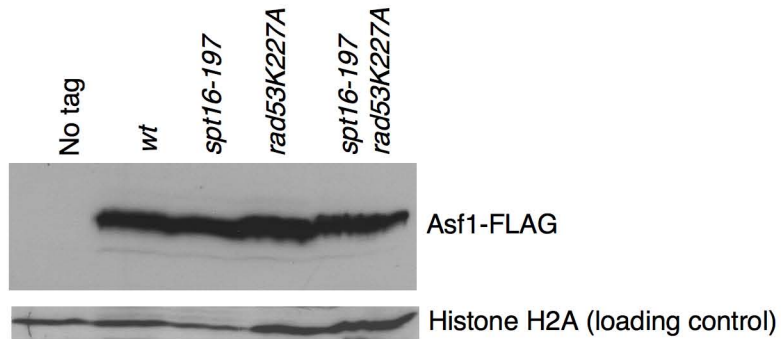

**C**

*ACT1* transcript levels normalized to rRNA in *spt16-197* Asf1-FLAG3 strain

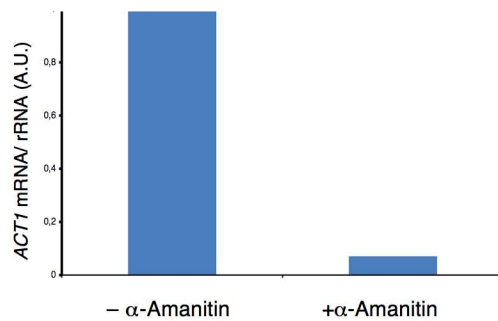

**D**

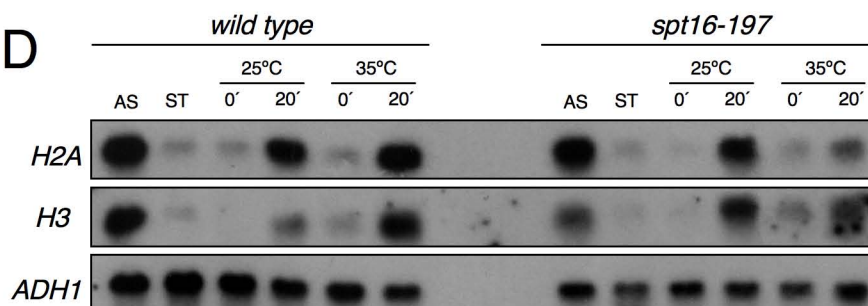

Figure S5
